# Supplementary material
Source: PubMed Central journal article supplement (PMC10810226)

## Supporting Information.

**A new molecular graph-based deep learning algorithm facilitates an imaging-based strategy for rapid discovery of small molecules modulating biomolecular condensates**

Authors:

Peng Gao<sup>1</sup>, Qi Zhang<sup>1</sup>, Devin Keely<sup>2</sup>, Don W. Cleveland<sup>3</sup>, Yihong Ye<sup>4</sup>, Wei Zheng<sup>1</sup>, Min Shen<sup>1\*</sup>, and Haiyang Yu<sup>2\*#</sup>

Affiliations

<sup>1</sup>*The National Center for Advancing Translational Sciences (NCATS), National Institutes of Health (NIH), MD 20850, USA*

<sup>2</sup>*Center for Alzheimer's and Neurodegenerative Diseases, Department of Molecular Biology, Peter O'Donnell Jr. Brain Institute, UT Southwestern Medical Center, TX, 75287, USA*

<sup>3</sup>*Department of Cellular and Molecular Medicine, UC San Diego, CA, 92093, USA*

<sup>4</sup>*National Institute of Diabetes and Digestive and Kidney Diseases (NIDDK), National Institutes of Health (NIH), MD 20850, USA;*

\*Correspondence:

haiyang.yu@utsouthwestern.edu  
shenmin@mail.nih.gov

#Current affiliation: *Department of Neuroscience, Genentech, Inc., South San Francisco, CA 94080, USA. Email: [yu.haiyang@gene.com](mailto:yu.haiyang@gene.com)*

**Supporting Information Content:**

1. Clustering results of the qHTS screened compounds
2. The verified effect of compound A1-A5 on cellular LLPS compartments
3. QC reports of compound A1-A5

## Clustering of the screened compounds

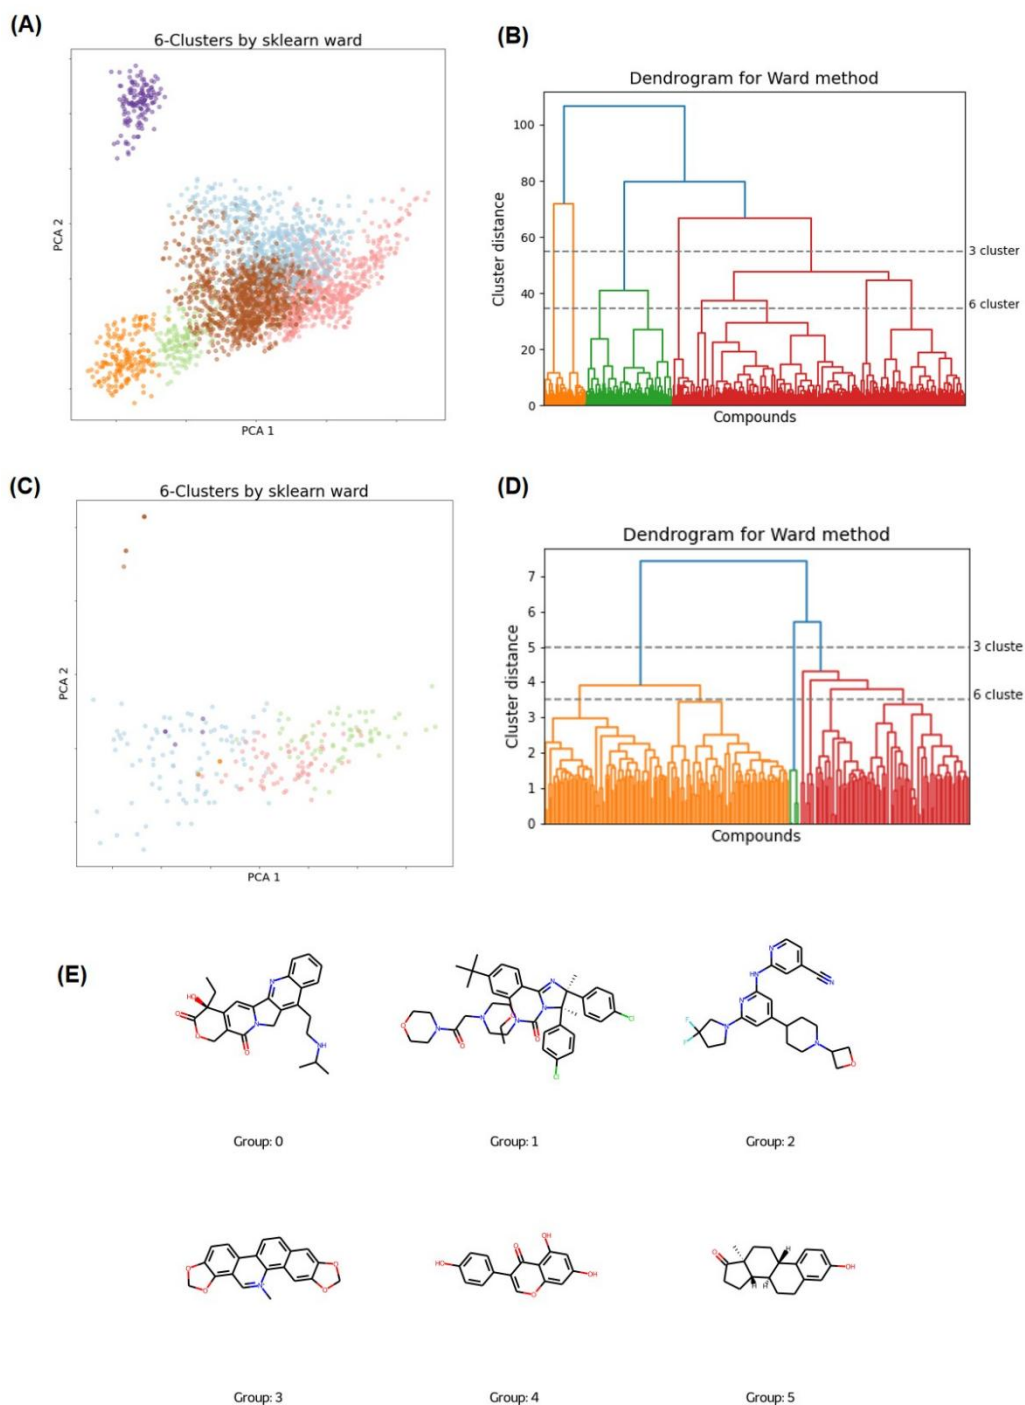

**Figure S1. The Principle Component Analysis (PCA) & clustering of the qHTS screened compounds by Ward method. (A-B)** The clustering result of all the screened compounds by qHTS, the compounds are divided into six clusters (represented by six colors) for statistics. **(C-D)** The clustering result of the identified active compounds, the compounds are divided into six clusters (represented by six colors) for statistics. **(E)** Some of the screened compounds with different scaffolds.

DLD1 cells → Compound (10uM) for 24h → NaAsO<sub>2</sub> (250uM) for 1 hour → Fix, Immunostaining and imaging

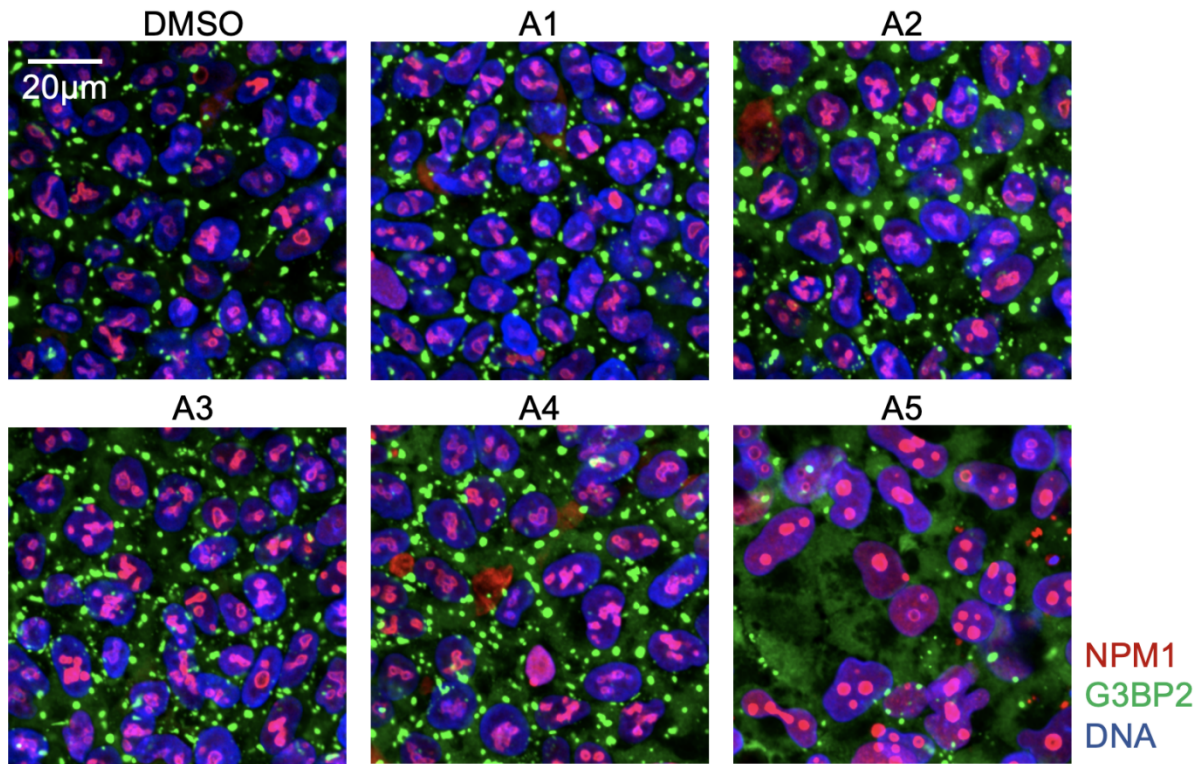

**Figure S2. The effect of compound A1-A5 on other cellular LLPS compartments.** To determine whether compounds A1-A5 modulates other LLPS phenomenon in the cells, Stress granules were induced and stress granule marker G3BP1 and nucleolus marker NPM1 were stained. DLD1 cells were treated with compounds A1-A5 and DMSO was used as control. After 24-hour compound treatment, cells were treated with 250µM sodium arsenite (flow chart on the top). Cells were fixed and stained with G3BP1 in green and NPM1 in red.

File ..mschem\03-23\270323-NCGC00137390-01-08038.D Tgt Mass (EZX): 445.01  
 Injection Date : 27-Mar-23, 11:10:46 Seq. Line : 0  
 Sample Name : NCGC00137390-01 Location : D2F-A1  
 Acq. Operator : Hsiu-Ling Lin Inj : 1  
 Spec. Reported : UV Integration Inj Volume : -3 ul  
 Acq. Method : C:\Users\Public\Documents\ChemStation\1\Methods\FINAL\_GRAD\_NO\_PRINT.M  
 Analysis Method : C:\Users\Public\Documents\ChemStation\1\Methods\FINAL\_GRAD\_NO\_PRINT.M  
 Sample Info : 0050688158 WalkUp method: 'FINAL\_GRD\_NO PRINT' Mol Wt: 445.01  
 Method Info : FINAL GRD BUT NO PRINT

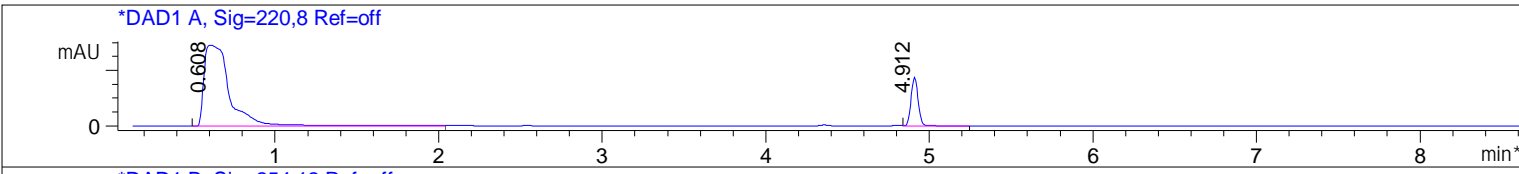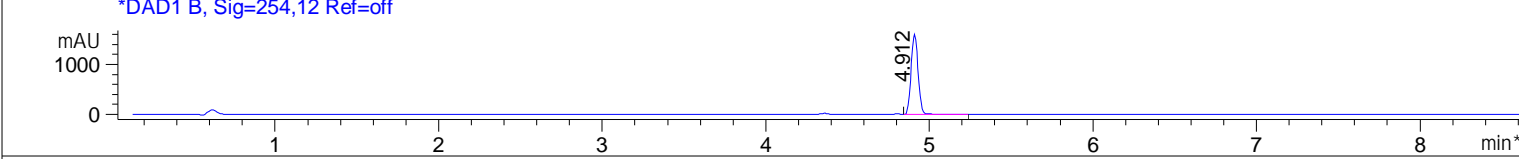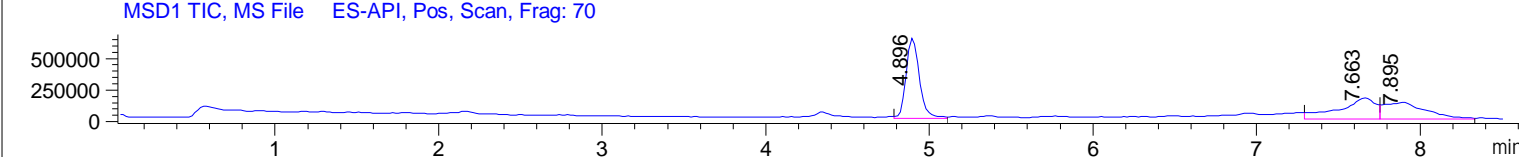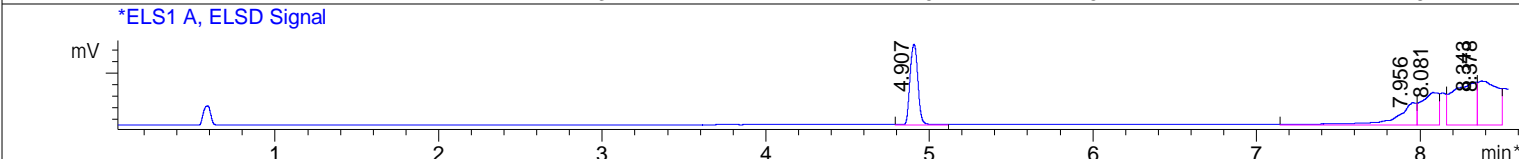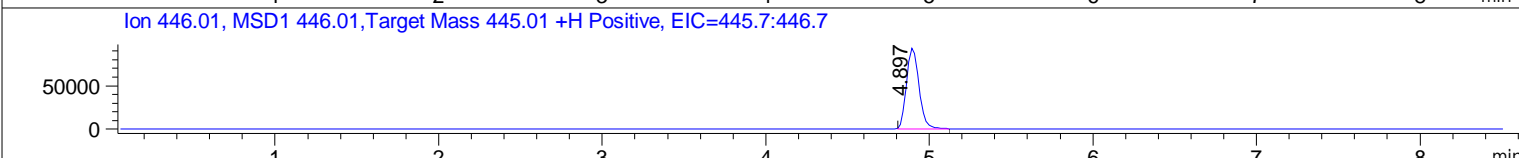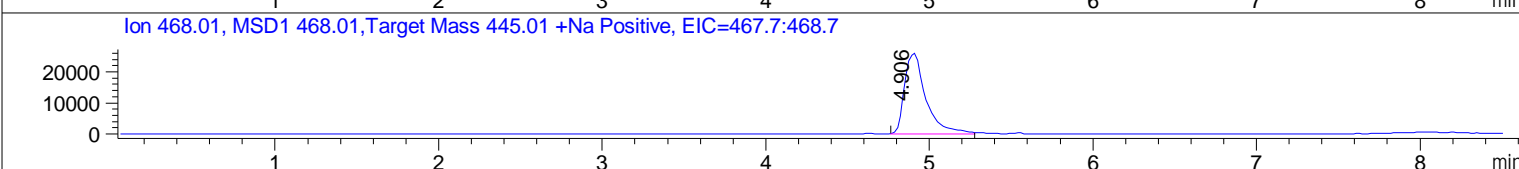

Integration Results for DAD1 A, Sig=220,8 Ref=off

| RetTim | Width | Area     | Height  | Area% | MS(+) |
|--------|-------|----------|---------|-------|-------|
| 0.61   | 0.15  | 31303.33 | 2902.91 | 85.26 | 179   |
| 4.91   | 0.05  | 5413.07  | 1749.94 | 14.74 | 298   |

Integration Results for DAD1 B, Sig=254,12 Ref=off

| RetTim | Width | Area    | Height  | Area%  | MS(+) |
|--------|-------|---------|---------|--------|-------|
| 4.91   | 0.05  | 4843.56 | 1606.18 | 100.00 | 298   |

Ret. Time: 0.61 <<<< POSITIVE SPECTRA >>>>

Ret. Time: 4.91

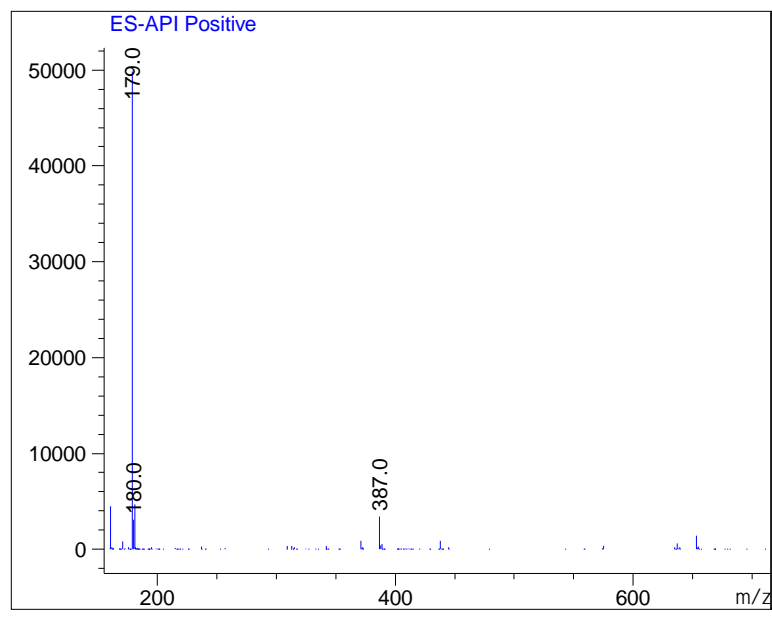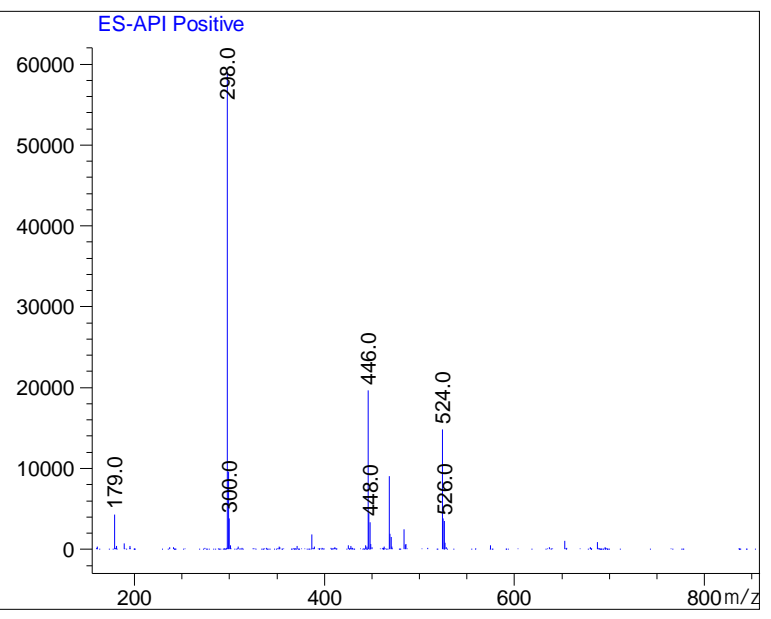

File ..mschem\03-23\270323-NCGC00017285-04-08039.D Tgt Mass (EZX): 257.11  
 Injection Date : 27-Mar-23, 11:20:57 Seq. Line : 0  
 Sample Name : NCGC00017285-04 Location : D2F-B1  
 Acq. Operator : Hsiu-Ling Lin Inj : 1  
 Spec. Reported : UV Integration Inj Volume : -3 ul  
 Acq. Method : C:\Users\Public\Documents\ChemStation\1\Methods\FINAL\_GRAD\_NO\_PRINT.M  
 Analysis Method : C:\Users\Public\Documents\ChemStation\1\Methods\FINAL\_GRAD\_NO\_PRINT.M  
 Sample Info : 0068079948 WalkUp method: 'FINAL\_GRD\_NO PRINT' Mol Wt: 257.11  
 Method Info : FINAL GRD BUT NO PRINT

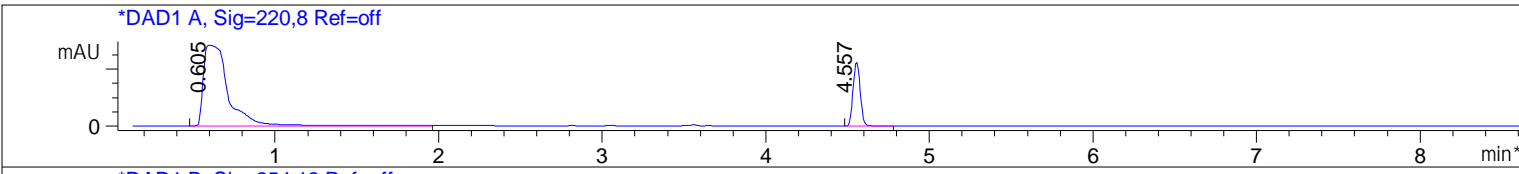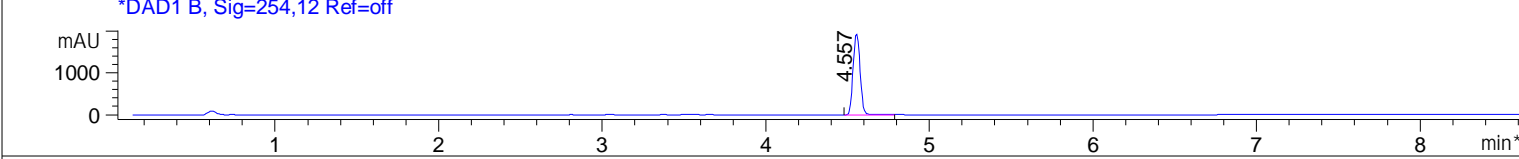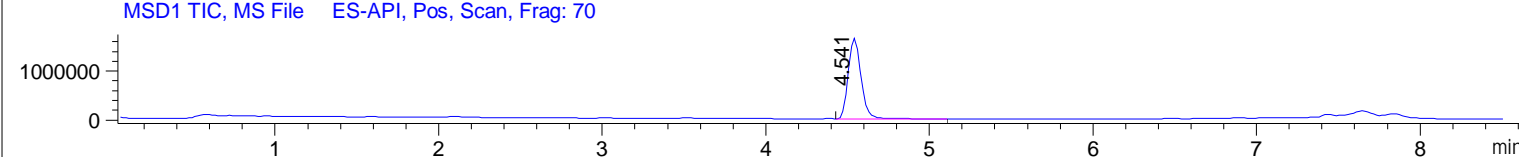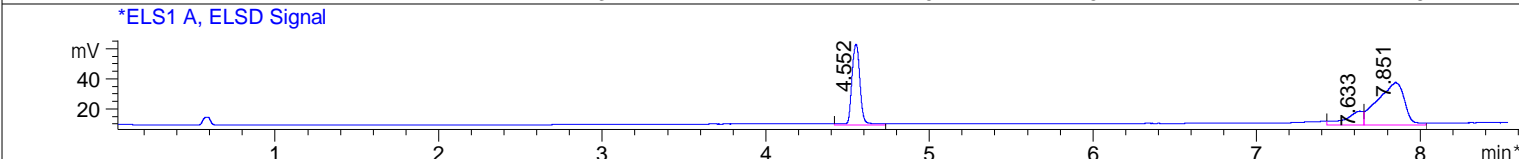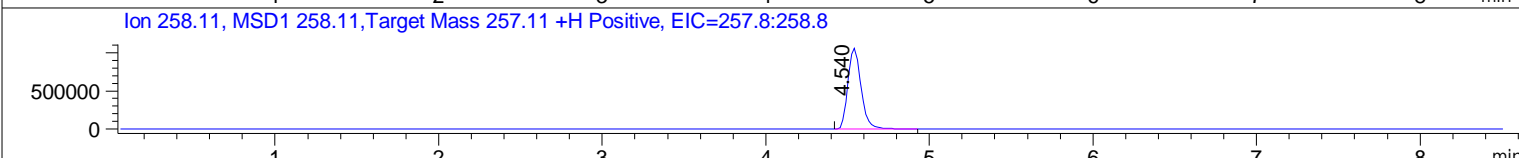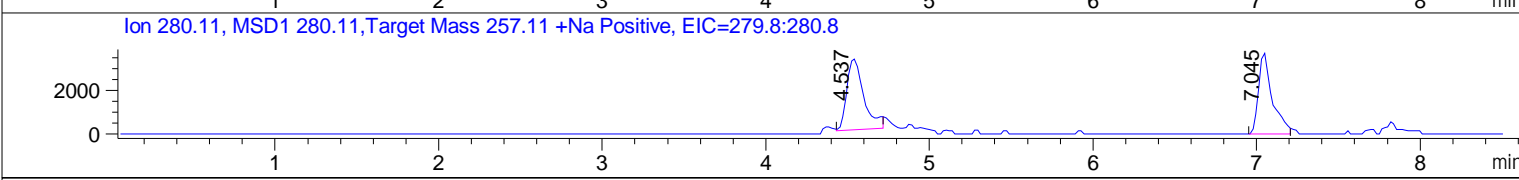

Integration Results for DAD1 A, Sig=220,8 Ref=off

| RetTim | Width | Area     | Height  | Area% | MS(+) |
|--------|-------|----------|---------|-------|-------|
| 0.60   | 0.16  | 30177.99 | 2855.86 | 81.38 | 179   |
| 4.56   | 0.05  | 6905.01  | 2255.73 | 18.62 | 258   |

Integration Results for DAD1 B, Sig=254,12 Ref=off

| RetTim | Width | Area    | Height  | Area%  | MS(+) |
|--------|-------|---------|---------|--------|-------|
| 4.56   | 0.05  | 5763.82 | 1938.35 | 100.00 | 258   |

Ret. Time: 0.60 <<<< POSITIVE SPECTRA >>>>

Ret. Time: 4.56

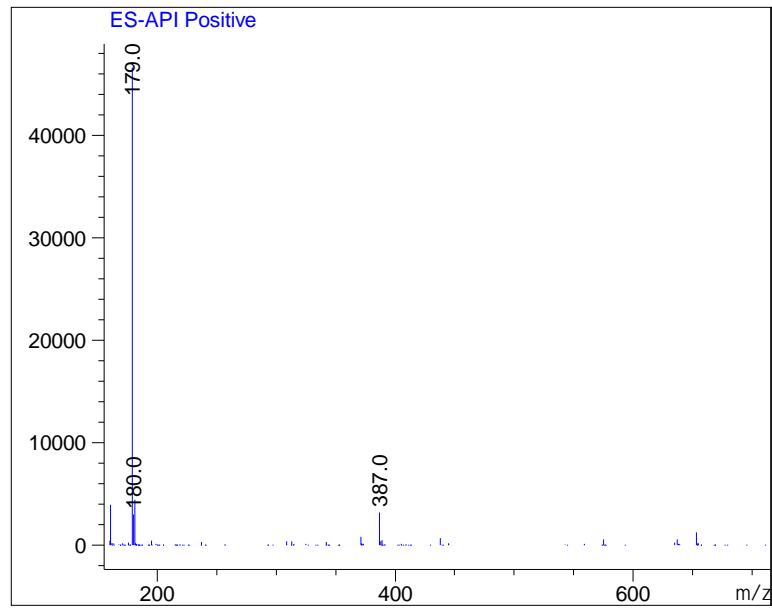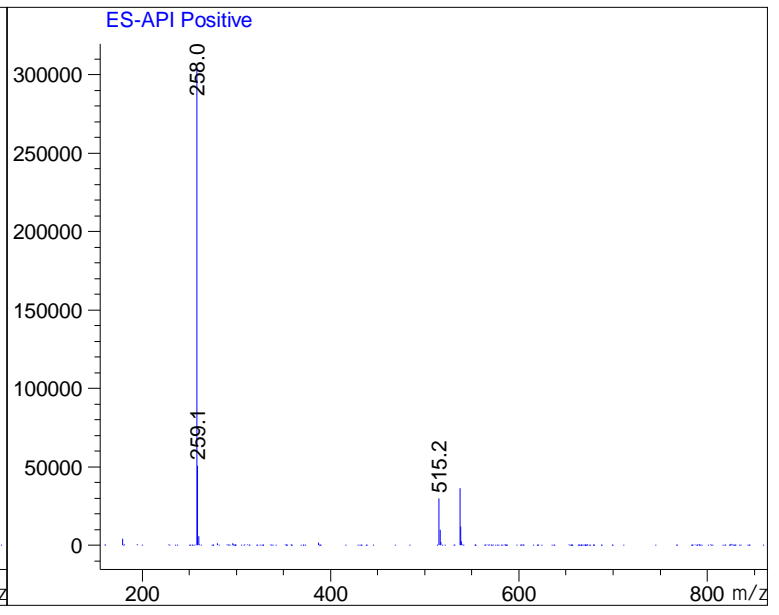



File ..mschem\03-23\270323-NCGC00123946-01-08040.D Tgt Mass (EZX): 452.13  
 Injection Date : 27-Mar-23, 11:30:56 Seq. Line : 0  
 Sample Name : NCGC00123946-01 Location : D2F-C1  
 Acq. Operator : Hsiu-Ling Lin Inj : 1  
 Spec. Reported : UV Integration Inj Volume : -3 ul  
 Acq. Method : C:\Users\Public\Documents\ChemStation\1\Methods\FINAL\_GRAD\_NO\_PRINT.M  
 Analysis Method : C:\Users\Public\Documents\ChemStation\1\Methods\FINAL\_GRAD\_NO\_PRINT.M  
 Sample Info : 0050708857 WalkUp method: 'FINAL\_GRD\_NO PRINT' Mol Wt: 452.13  
 Method Info : FINAL GRD BUT NO PRINT

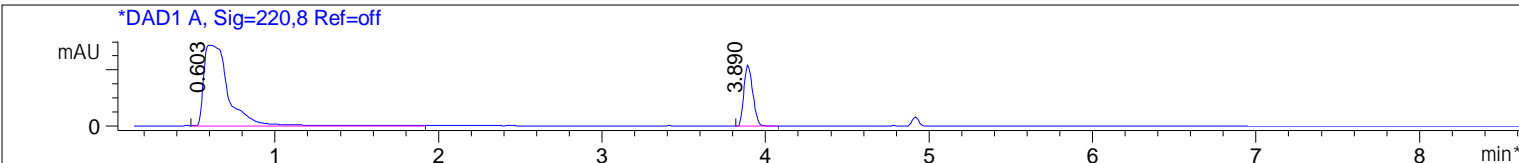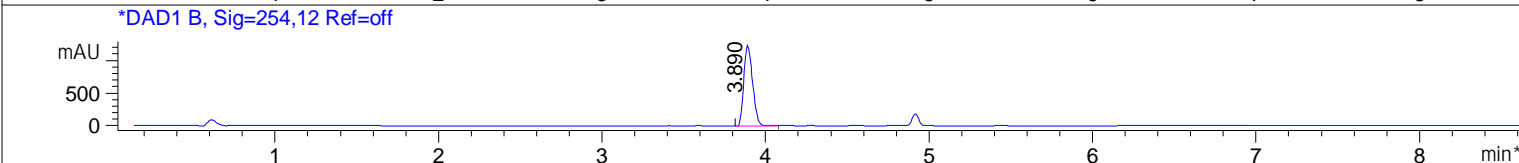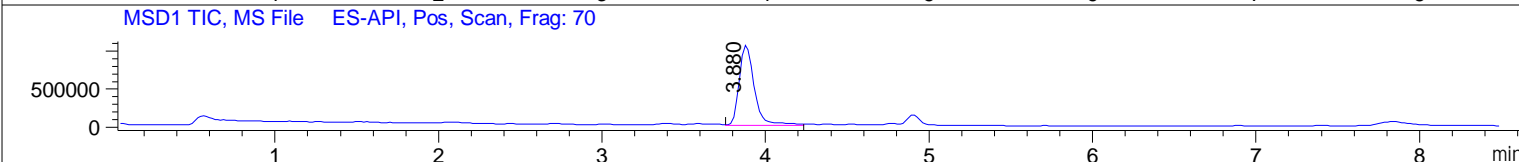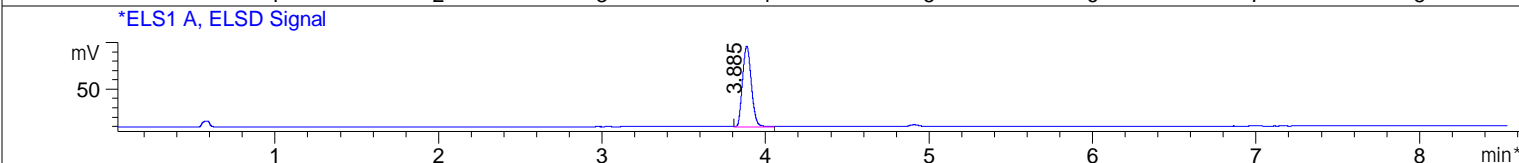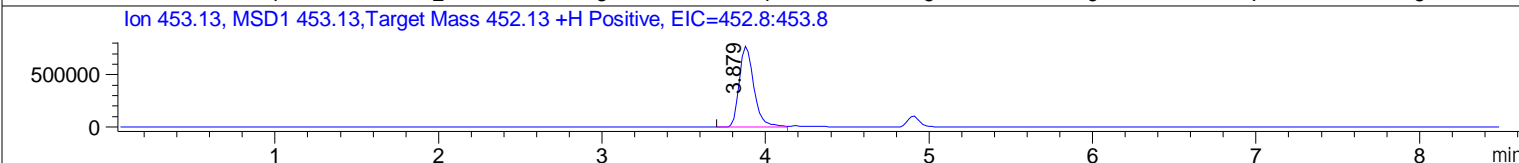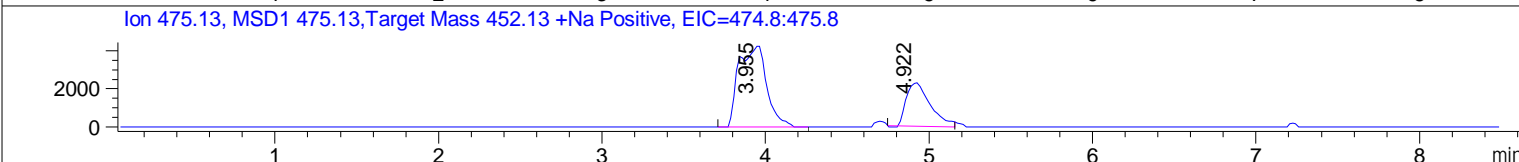

Integration Results for DAD1 A, Sig=220,8 Ref=off

| RetTim | Width | Area     | Height  | Area% | MS(+) |
|--------|-------|----------|---------|-------|-------|
| 0.60   | 0.16  | 30328.42 | 2879.10 | 78.74 | 179   |
| 3.89   | 0.06  | 8190.48  | 2165.96 | 21.26 | 453   |

Integration Results for DAD1 B, Sig=254,12 Ref=off

| RetTim | Width | Area    | Height  | Area%  | MS(+) |
|--------|-------|---------|---------|--------|-------|
| 3.89   | 0.06  | 4565.96 | 1235.76 | 100.00 | 453   |

Ret. Time: 0.60 <<<< POSITIVE SPECTRA >>>>

Ret. Time: 3.89

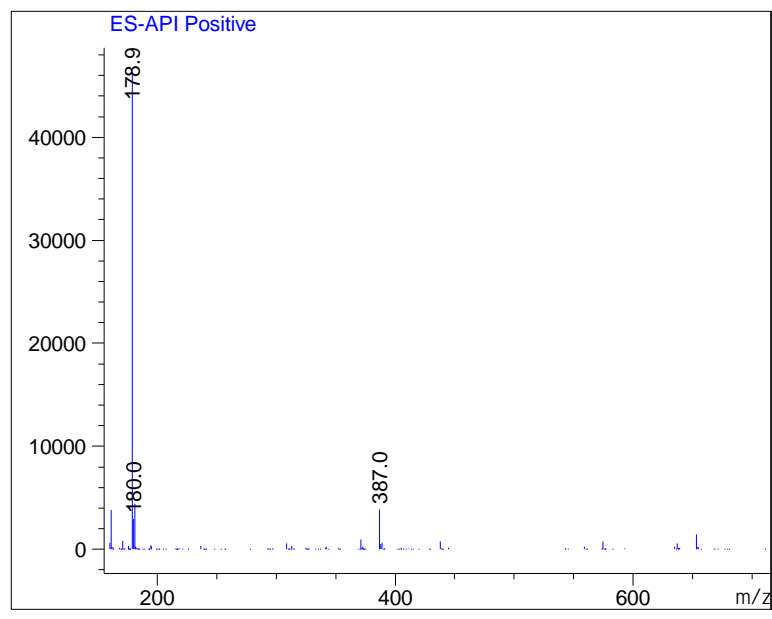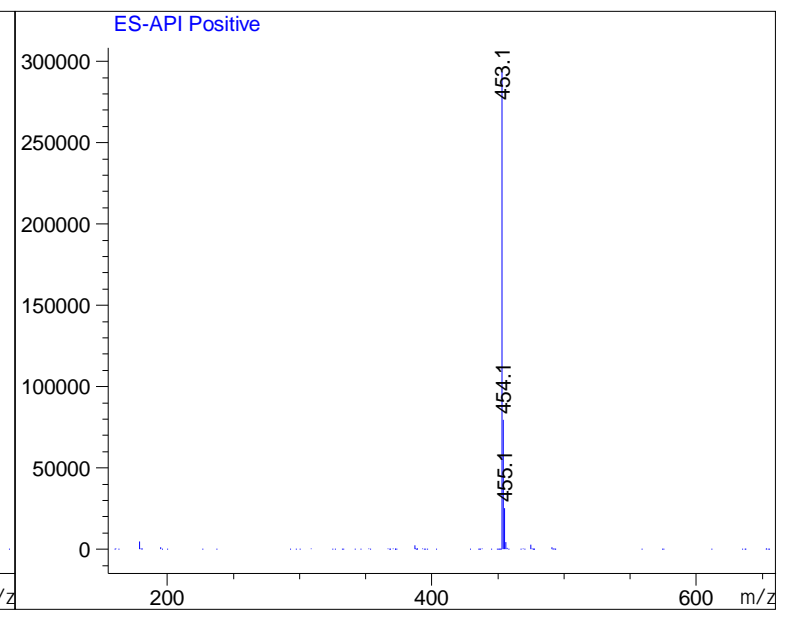

File ..mschem\03-23\270323-NCGC00126599-01-08041.D Tgt Mass (EZX): 268.13  
 Injection Date : 27-Mar-23, 11:40:54 Seq. Line : 0  
 Sample Name : NCGC00126599-01 Location : D2F-D1  
 Acq. Operator : Hsiu-Ling Lin Inj : 1  
 Spec. Reported : UV Integration Inj Volume : -3 ul  
 Acq. Method : C:\Users\Public\Documents\ChemStation\1\Methods\FINAL\_GRAD\_NO\_PRINT.M  
 Analysis Method : C:\Users\Public\Documents\ChemStation\1\Methods\FINAL\_GRAD\_NO\_PRINT.M  
 Sample Info : 0050684671 WalkUp method: 'FINAL\_GRD\_NO PRINT' Mol Wt: 268.13  
 Method Info : FINAL GRD BUT NO PRINT

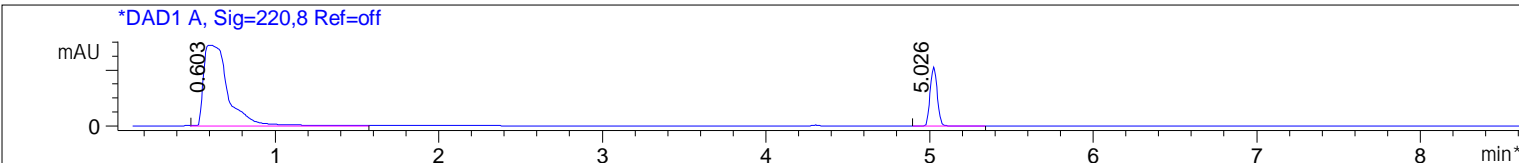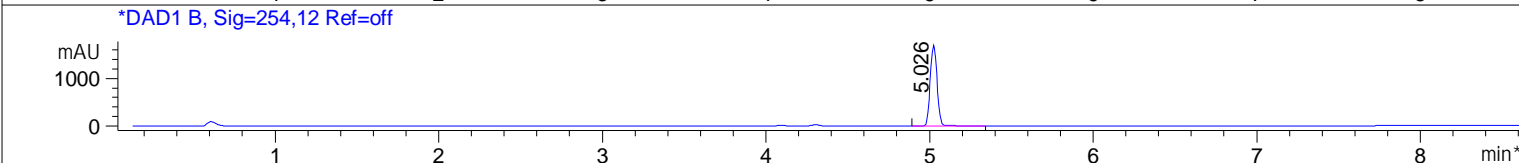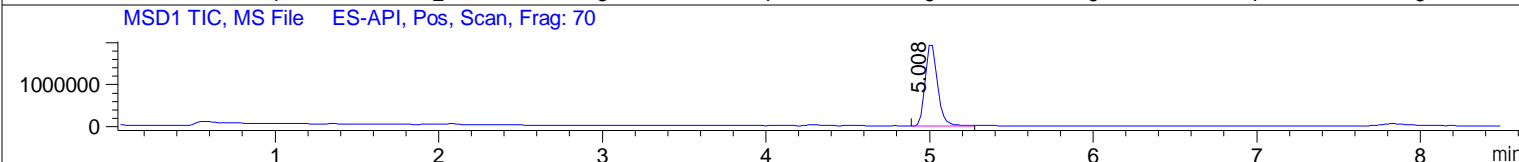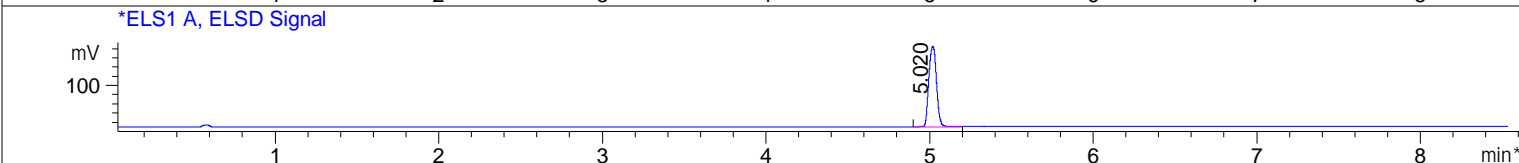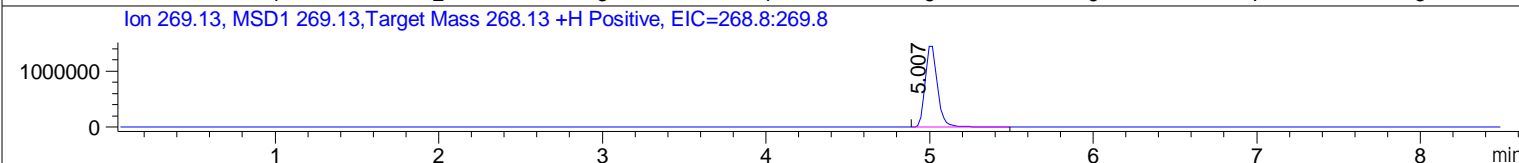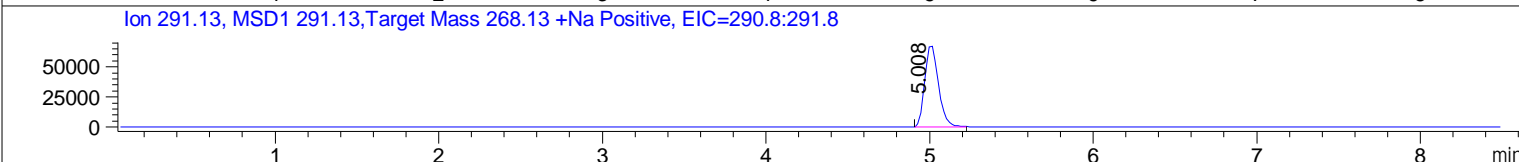

Integration Results for DAD1 A, Sig=220,8 Ref=off

| RetTim | Width | Area     | Height  | Area% | MS(+) |
|--------|-------|----------|---------|-------|-------|
| 0.60   | 0.16  | 30140.36 | 2897.92 | 82.48 | 179   |
| 5.03   | 0.05  | 6403.17  | 2118.90 | 17.52 | 269   |

Integration Results for DAD1 B, Sig=254,12 Ref=off

| RetTim | Width | Area    | Height  | Area%  | MS(+) |
|--------|-------|---------|---------|--------|-------|
| 5.03   | 0.05  | 4935.17 | 1709.14 | 100.00 | 269   |

Ret. Time: 0.60 <<<< POSITIVE SPECTRA >>>>

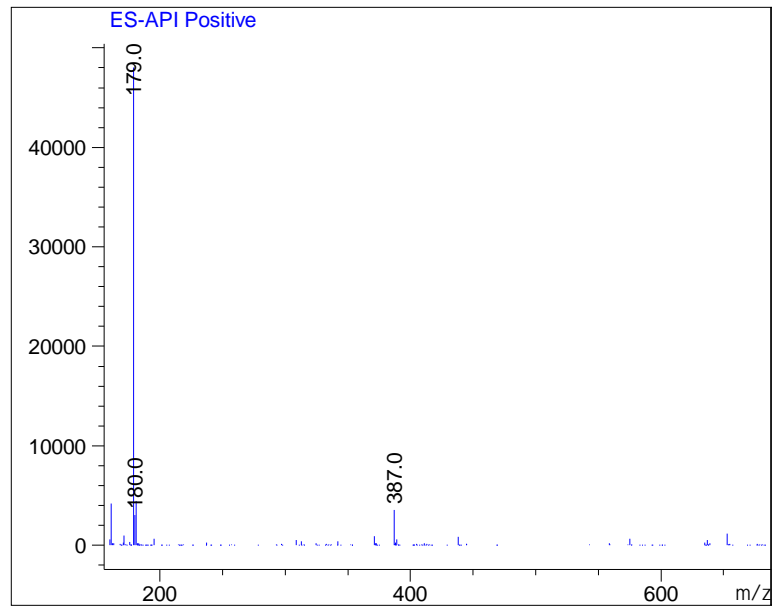

Ret. Time: 5.03

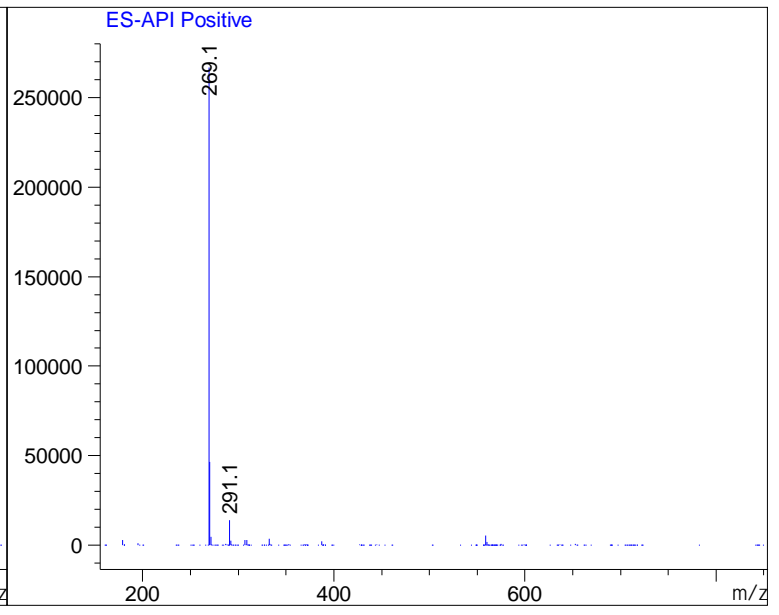

File ..mschem\03-23\270323-NCGC00168931-02-08042.D Tgt Mass (EZX): 246.13  
 Injection Date : 27-Mar-23, 11:50:54 Seq. Line : 0  
 Sample Name : NCGC00168931-02 Location : D2F-E1  
 Acq. Operator : Hsiu-Ling Lin Inj : 1  
 Spec. Reported : UV Integration Inj Volume : -3 ul  
 Acq. Method : C:\Users\Public\Documents\ChemStation\1\Methods\FINAL\_GRAD\_NO\_PRINT.M  
 Analysis Method : C:\Users\Public\Documents\ChemStation\1\Methods\FINAL\_GRAD\_NO\_PRINT.M  
 Sample Info : 0190189536 WalkUp method: 'FINAL\_GRD\_NO PRINT' Mol Wt: 246.13  
 Method Info : FINAL GRD BUT NO PRINT

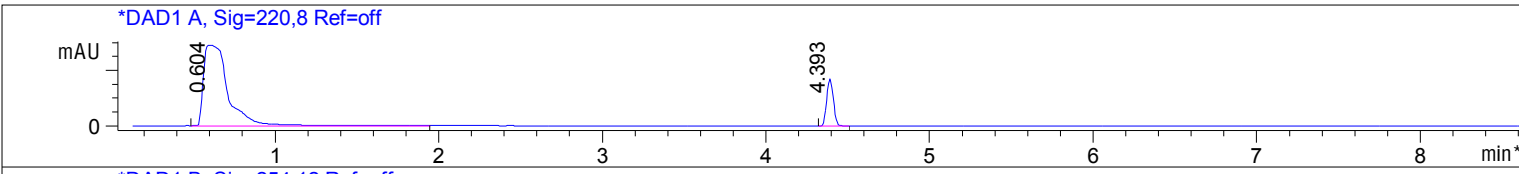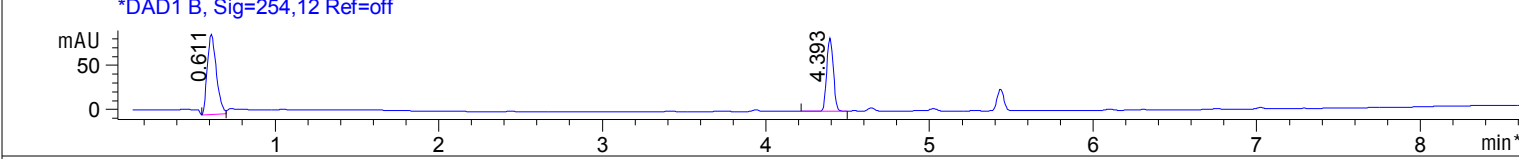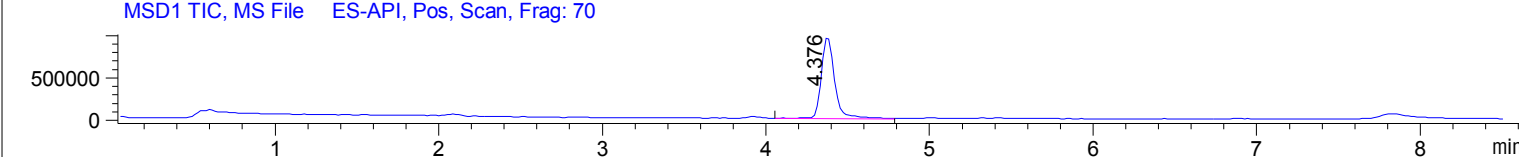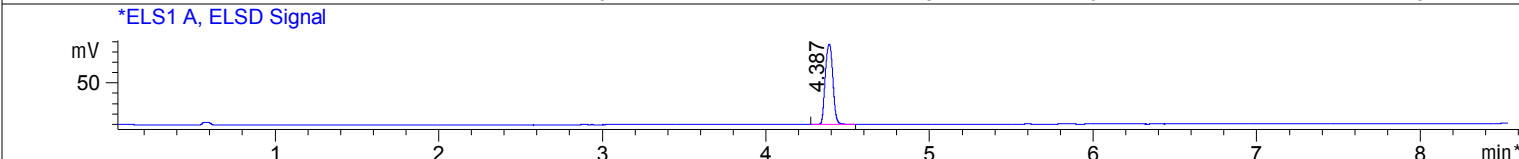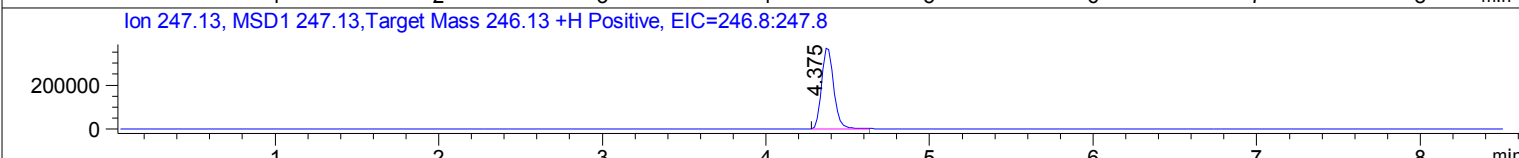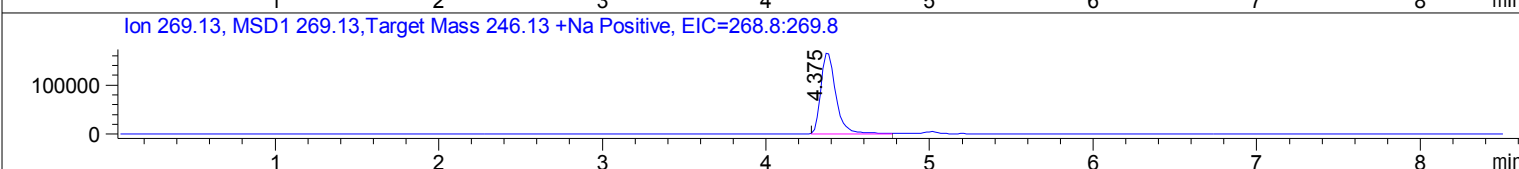

Integration Results for DAD1 A, Sig=220,8 Ref=off

| RetTim | Width | Area     | Height  | Area% | MS (+) |
|--------|-------|----------|---------|-------|--------|
| 0.60   | 0.16  | 30402.55 | 2907.19 | 86.30 | 179    |
| 4.39   | 0.05  | 4826.55  | 1679.70 | 13.70 | 247    |

Integration Results for DAD1 B, Sig=254,12 Ref=off

| RetTim | Width | Area   | Height | Area% | MS (+) |
|--------|-------|--------|--------|-------|--------|
| 0.61   | 0.06  | 352.27 | 91.17  | 59.88 | 179    |
| 4.39   | 0.05  | 235.98 | 83.17  | 40.12 | 247    |

Ret. Time: 0.60 <<<< POSITIVE SPECTRA >>>>

Ret. Time: 4.39

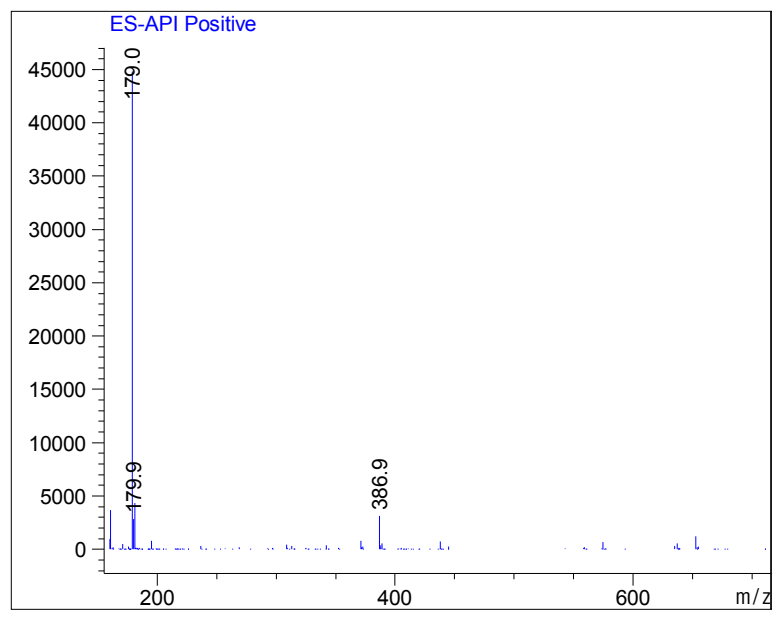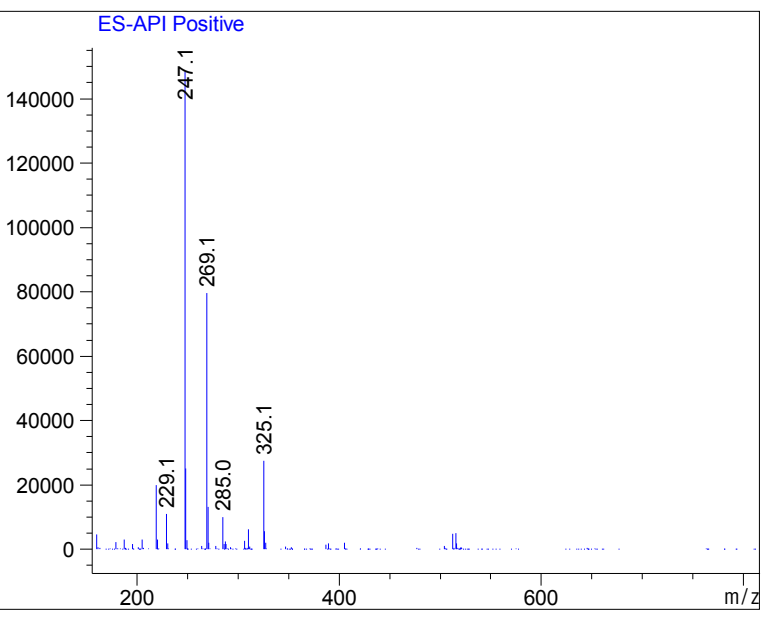

Supplement: NIHMS1958786-supplement-Supplemental_Information.pdf [file NIHMS1958786-supplement-Supplemental_Information.pdf]
